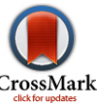

# <sup>1</sup>H-NMR Metabolomic Biomarkers of Poor Outcome after Hemorrhagic Shock are Absent in Hibernators

Lori K. Bogren<sup>1,2\*</sup>, Carl J. Murphy<sup>1</sup>, Erin L. Johnston<sup>1</sup>, Neeraj Sinha<sup>3</sup>, Natalie J. Serkova<sup>4,5</sup>, Kelly L. Drew<sup>1,2</sup>

**1** Department of Chemistry and Biochemistry, University of Alaska Fairbanks, Fairbanks, AK, United States of America, **2** Institute of Arctic Biology, University of Alaska Fairbanks, Fairbanks, AK, United States of America, **3** Centre of Biomedical Research, SGP GIMS Campus, Lucknow, Uttar Pradesh, India, **4** Department of Anesthesiology, University of Colorado Anschutz Medical Campus, Aurora, CO, United States of America, **5** University of Colorado Cancer Center, University of Colorado Anschutz Medical Campus, Aurora, CO, United States of America

## Abstract

**Background:** Hemorrhagic shock (HS) following trauma is a leading cause of death among persons under the age of 40. During HS the body undergoes systemic warm ischemia followed by reperfusion during medical intervention. Ischemia/reperfusion (I/R) results in a disruption of cellular metabolic processes that ultimately lead to tissue and organ dysfunction or failure. Resistance to I/R injury is a characteristic of hibernating mammals. The present study sought to identify circulating metabolites in the rat as biomarkers for metabolic alterations associated with poor outcome after HS. Arctic ground squirrels (AGS), a hibernating species that resists I/R injury independent of decreased body temperature (warm I/R), was used as a negative control.

**Methodology/principal findings:** Male Sprague-Dawley rats and AGS were subject to HS by withdrawing blood to a mean arterial pressure (MAP) of 35 mmHg and maintaining the low MAP for 20 min before reperfusing with Ringers. The animals' temperature was maintained at 37±0.5°C for the duration of the experiment. Plasma samples were taken immediately before hemorrhage and three hours after reperfusion. Hydrophilic and lipid metabolites from plasma were then analyzed via <sup>1</sup>H-NMR from unprocessed plasma and lipid extracts, respectively. Rats, susceptible to I/R injury, had a qualitative shift in their hydrophilic metabolic fingerprint including differential activation of glucose and anaerobic metabolism and had alterations in several metabolites during I/R indicative of metabolic adjustments and organ damage. In contrast, I/R injury resistant AGS, regardless of season or body temperature, maintained a stable metabolic homeostasis revealed by a qualitative <sup>1</sup>H-NMR metabolic profile with few changes in quantified metabolites during HS-induced global I/R.

**Conclusions/significance:** An increase in circulating metabolites indicative of anaerobic metabolism and activation of glycolytic pathways is associated with poor prognosis after HS in rats. These same biomarkers are absent in AGS after HS with warm I/R.

**Citation:** Bogren LK, Murphy CJ, Johnston EL, Sinha N, Serkova NJ, et al. (2014) <sup>1</sup>H-NMR Metabolomic Biomarkers of Poor Outcome after Hemorrhagic Shock are Absent in Hibernators. PLoS ONE 9(9): e107493. doi:10.1371/journal.pone.0107493

**Editor:** Partha Mukhopadhyay, National Institutes of Health, United States of America

**Received:** February 25, 2014; **Accepted:** August 12, 2014; **Published:** September 11, 2014

**Copyright:** © 2014 Bogren et al. This is an open-access article distributed under the terms of the Creative Commons Attribution License, which permits unrestricted use, distribution, and reproduction in any medium, provided the original author and source are credited.

**Funding:** This research was supported by USAMRMC W81XWH009-2-0134, the University of Alaska Graduate School Dissertation Completion Fellowship, the University of Alaska Institute of Arctic Biology, and Alaska INBRE. The funders had no role in study design, data collection and analysis, decision to publish, or preparation of the manuscript.

**Competing Interests:** The authors have declared that no competing interests exist.

\* Email: lbogren@alaska.edu

## Introduction

Hemorrhagic shock is a life threatening medical condition most often associated with trauma. Trauma is the third leading cause of death for persons under the age of 40 with approximately one third of these deaths resulting from HS [1,2]. During HS the massive loss of blood reduces systemic blood pressure and produces I/R injury. Hypoperfusion of tissue decreases the removal of waste products and supply of oxygen and nutrients resulting in cellular dysfunction. This is then compounded with the generation of reactive oxygen species during reperfusion that leads to further tissue damage [3,4].

Hibernating animals, such as ground squirrels, have been shown to have an innate resistance to I/R injury. This resistance is found not only in isolated organ I/R, but also in systemic I/R such as HS [5–11]. The arctic ground squirrel (*Urocitellus parryii*, AGS)

survive HS-induced I/R without tissue damage or multi organ failure, independent of their hibernation state, season, or tissue temperature [11]. There is also a well-documented ability in ground squirrels to switch fuel sources from carbohydrate- to lipid-based metabolism during their hibernation season [6,12–22]. Previous studies in our lab indicated that, in conjunction to their resistance to HS-I/R injury, AGS also have an altered plasma glucose/lactate ratio and base excess response during HS as compared to an I/R injury-prone species, indicating that they may have a different metabolic response to I/R [11]. Differences in metabolic process during I/R in the injury-prone species versus an injury-resistant species is not known and may provide valuable information as to the molecular basis of the protective phenotype.

This study sought to identify circulating metabolites in the rat as biomarkers for metabolic alterations associated with poor outcome after HS. AGS, a hibernating species that resists I/R injury

independent of temperature drop (warm I/R), was used as a negative control. Specifically, we expected to see differential activation of glucose and anaerobic metabolism in the I/R injury prone rat and not in the I/R injury-resistant AGS. Another purpose of this study was to identify changes in circulating metabolic profiles and metabolites in hibernators which may contribute to their innate resistance against I/R injury and multi organ failure. Refinement in the identification of these metabolic pathways will provide further insight into this mechanism. We found that during HS-I/R rats displayed a shift in metabolic profiles related to carbohydrate turnover, anaerobic metabolism, and organ dysfunction while AGS maintained their metabolic homeostasis and lacked biomarkers of organ dysfunction.

## Methods

<sup>1</sup>H-NMR-metabolomic analysis of total plasma samples and their lipophilic fractions taken before and after HS-I/R was conducted for I/R injury prone rats as well as I/R injury resistant summer/euthermic (EU) and winter/interbout arousal (IBA) AGS. Spectral patterns were qualitatively compared for overall changes in the metabolic “fingerprints” for naïve, sham, and hemorrhaged animals. Qualitative analysis was followed by quantification of specific metabolites identified in the spectra. These parameters from each experimental condition were then compared between the I/R injury-prone rat and the injury-resistant EU-, IBA-AGS.

## Animals and ethics statement

All animal procedures were performed in strict accordance with the *Guide for the Care and Use of Laboratory Animals* and approved by the Animal Use and Care Committee of the University of Alaska Fairbanks. Capture and holding of AGS was performed under permit by the Alaska Department of Fish and Game. Juvenile AGS were live trapped north of the Brooks Range (66°38'N, 149°38'W) in Alaska during July and were maintained in captivity at least ten months prior to the experiments. The AGS were housed at 22°C under light conditions based on 69° latitude from time of capture until late August when they were then transferred to a cold chamber. AGS remained in the cold chamber (2°C) with 4:20 light:dark conditions until the experiments which were conducted between May and June (summer, euthermic) and December- February (winter, interbout arousal). Food and water were provided ad libitum but to normalize glycogen levels, food was removed twenty hours prior to surgery. Both male and female AGS (438–1123 g, n = 41) were used in this study due to the availability of wild caught animals. There is not an opportunity to select the gender of wild-trapped AGS. Consequently, gender is balanced across groups. Because AGS are reproductive for a short time period in the early spring, animals were not used during the four week period following the end of spontaneous torpor bouts when estrogen and testosterone levels are elevated [25,26]. In contrast, female rats have estrus cycles every 4–5 days [23] with concurrent fluctuations in estrogen levels. Estrogen is known to be protective against I/R injury [24] Thus, female rats were not used in this study to avoid the confounding effect of estrogen on I/R protection.

Summer/euthermic status of an animal was assessed by body temperature, activity and lack of spontaneous torpor for at least four weeks. Animals were considered to be in the winter/hibernation season when they had been having regular spontaneous torpor bouts for at least eight weeks prior to the experiments. For IBA animals, arousal was induced 18 hours before the start of

the experiment by gentle calisthenics. All animals were at euthermic core body temperatures at the start of the experiment. Male Sprague-Dawley rats (350–420 g, n = 24) were obtained from University of Alaska Fairbanks Animal Resource Center (Sprague-Dawley derived from Simonson Laboratory, Gilroy, CA).

## Hemorrhagic shock

Anesthesia was induced and maintained with isoflurane and a 30:70 mixture of O<sub>2</sub> and N<sub>2</sub>O. Once unresponsive, the animals were intubated with an endotracheal catheter and connected to a ventilator humidified with mucomist (1.4 mL/70 mL H<sub>2</sub>O). Vital signs were monitored by electrocardiogram (EKG) and a rectal (core body temperature) and temporalis (head/brain temperature) thermocouples. The animals were then cannulated in their right femoral artery and vein and left femoral artery. MAP was measured via the femoral arterial catheter connected to a precalibrated pressure transducer and was recorded continuously. Blood was sampled every ten minutes for P<sub>CO2</sub> and P<sub>O2</sub>. Mechanically ventilated stroke volume, breaths per minute, and percent O<sub>2</sub> were changed until blood gases were within predetermined normal ranges as previously described [9,10]. Core body temperature and head temperature were maintained at 37±0.5°C from the start of surgical preparation until post HS monitoring. This was achieved with a heated water blanket under the animal and heat lamps placed above the head and back turned on below 36.5°C and off above 37.5°C by thermocouples placed in the temporalis muscle and lower bowel via T-C5C32 temperature controllers (Omega, Stamford, CT). Blood was then withdrawn over a 15 minute period to achieve a target MAP of 35 mmHg. The MAP was held at ~35 mmHg for 20 minutes before animals were reperfused intravenously with non-lactated Ringers solution (148 mM NaCl, 2 mM CaCl<sub>2</sub>, 4 mM KCl) equal to 2/3 volume of the blood removed during hemorrhage (Hospira, Inc., Lake Forest, IL). After HS animals were monitored for an additional three hours under anesthesia and then euthanized via decapitation. Sham hemorrhagic shock (SHS) animals were subject to the surgical procedure, but blood was not removed nor Ringers administered. Experimental design and groups are summarized in Figure S1 and Table S1. I/R and sham experiments were conducted on alternating days. Naive animals were included as a control for effects of surgery. AGS were matched for sex and hibernation phenotype (Tables S2-S5).

EDTA-treated plasma samples were collected from the femoral artery immediately prior to HS (baseline) and by cardiac puncture at the end of the three hour monitoring period. Blood from naive animals was collected via cardiac puncture. Samples were kept on ice and then snap frozen in liquid nitrogen before being stored at –80°C.

## Quantitative <sup>1</sup>H-NMR on unprocessed plasma and lipid extracts

For NMR analysis, samples of EDTA-preserved plasma in deuterium oxide (D<sub>2</sub>O, 99.8% Alfa Aesar, Ward Hill, MA; 150:450 µL) were transferred into 5-mm NMR tubes (Wilmad Lab Glass, Buena, NJ). <sup>1</sup>H-NMR spectra were acquired at 5°C (based on Methanol calibration) with a 600-MHz Bruker Avance-III system running TopSpin 3.0 software (Bruker Biospin, Fremont, CA) using a dual resonance high resolution SmartProbe with single axis Z-gradient. The water signal was suppressed using NOESY presaturation followed by CPMG relaxation editing for suppression of macromolecules (“PROF\_CPMG” parameter set in TopSpin 3.0). A standard, trimethylsilyl propionic-2,2,3,3-tetradeuteriopropionic acid (TMSP, 5 mM in D<sub>2</sub>O) contained in a

coaxial insert and placed in the NMR tube was used for metabolite quantification of fully relaxed  $^1\text{H}$ -NMR spectra and as a  $^1\text{H}$  chemical shift reference (0.0 ppm). The  $^1\text{H}$ -NMR peaks for single metabolites were identified and referred to published chemical shift or a metabolite chemical shift library [27–30]. Two dimensional experiments including COSY, JRes, and HMQC were used to confirm assignments for selected samples (Fig. S2–S11). After Fourier transformation, phasing, and baseline correction in TopSpin, each  $^1\text{H}$  peak was integrated with Amix (Bruker Biospin). The absolute concentration of each metabolite was then referred to the TMSP integral and calculated according to the equation adapted from Serkova et al (25):  $C_x = (I_x \cdot N_x C) / I$ ; where  $C_x$  is metabolite concentration ( $\mu\text{mol}/\text{mL}$ ),  $I_x$  is integral of metabolite  $^1\text{H}$  peak,  $N_x$  is number of protons in metabolite  $^1\text{H}$  peak,  $C$  is TMSP concentration, and  $I$  is integral of TMSP  $^1\text{H}$  peak at 0 ppm (this is nine as TMSP contains nine protons). An additional correction factor of 8.68 was applied to adjust for the differences in diameters between the NMR tube and the insert (derived as the ratio of the cross-sectional areas of the tubes). The final metabolite concentrations were expressed as mM of EDTA-plasma volume. Glucose concentrations were not determined from the plasma spectra as presaturation to diminish the water signal also affected glucose peaks that are in close proximity.

Lipids were extracted from the EDTA-plasma samples using a dual chloroform/methanol extraction. Briefly, plasma was mixed (1:2 vol/vol) with cold chloroform/methanol (1:2 vol/vol) and centrifuged. Liquid was removed from the pellet and the pellet was washed again in chloroform/methanol and centrifuged. The second supernatant was removed and combined with the first which together were washed with cold water. The mixture was centrifuged to separate the lipophilic and hydrophilic fractions. Lipid extracts were lyophilized and reconstituted in 0.6 mL deuterated chloroform/methanol (1:2, vol/vol) for NMR analysis. TMP was contained in the deuterated methanol (0.3% 1.47 mM) and a coaxial insert was not used. No suppression of macromolecules was used.

## Statistics

Multivariate analysis (partial least squares-discriminant analysis; PLS-DA) was used for comprehensive metabolite profile analysis within complex  $^1\text{H}$ -NMR spectra. Initially, principle component analysis (PCA) was used but did not show good separation due to small sample size. Therefore, PLS-DA was selected for further analysis. PLS-DA was performed using MetaboAnalyst, a freely available, web-based application designed to support quantitative metabolomics [31,32]. Before being analyzed, the spectra were segmented into “buckets” each with a 0.01 ppm width. The water region (4.8–5.2 ppm) and EDTA regions (2.53–2.58, 3.1–3.3, and 3.6–3.7 ppm) were excluded from the bucketing and multivariate analysis of the unextracted plasma samples while the chloroform (8.0–7.5 ppm) and methanol (5.22–4.76 & 3.42–3.25 ppm) regions were excluded from the lipid spectra. Before PLS-DA, data was normalized to a Gaussian distribution (a feature in MetaboAnalyst; <http://www.metaboanalyst.ca>).

All data are presented as mean  $\pm$  SEM. Fold change was calculated as (final concentration - initial concentration)/initial concentration. Absolute individual concentrations of each metabolite were analyzed via three-way ANOVA with repeated measures (SAS; Cary, NC). Metabolites with a significant time  $\times$  group (EU-AGS, IBA-AGS, or rat)  $\times$  treatment (HS or SHS) interaction were further analyzed via two-way ANOVA with repeated measures. All significant effects in ANOVAs were followed by a Tukey's post-hoc test. Statistical significance was considered to be a  $p$  value of  $<0.05$ .

## Results

### Metabolic $^1\text{H}$ -NMR spectral pattern difference between test groups

The global metabolic profile of circulating metabolites present in the plasma of naïve animals was assessed via  $^1\text{H}$ -NMR spectral pattern comparison between each of the test groups (rats, EU-AGS, and IBA-AGS) through the multivariate statistical analysis, PLS-DA. PLS-DA is a supervised classification method that maximizes the separation of groups of data based on variables in the data that are ranked on their efficacy in explaining differences in the groups. PLS-DA summarizes the original variables into fewer variables using their weighted averages. These are then cross-validated to select an optimal number of components for classification. The top three components are then used for separation with each one being an axis ( $x$ ,  $y$ , and  $z$ ). The percentage next to each component indicates to what degree it contributed to the separation [32]. When analyzed for spectral pattern similarities using PLS-DA, each naïve group had distinct clustering (Fig. 1A). The clusters of the EU-AGS and IBA-AGS were closer in proximity to each other than to the rats, indicating greater spectral similarity between the two seasonalities of AGS than either had with the other species. Most of the animals in the AGS groups clustered together; however, in each group there was a distinct outlier. The naïve rats showed less of this clustering and were more spread out. Each group (rat, EU-AGS, IBA-AGS) was examined with PLS-DA for differences between all experimental points (naïve vs. before HS vs. after HS vs. before SHS vs after SHS; Fig. S12). There were differences seen due to the surgery itself (before SHS vs. after SHS) and differences from naïve animals. To account for this, only the metabolites that changed after HS (and not after SHS) were analyzed. Due to the basal metabolic differences between species and hibernation season, metabolites that changed due the HS were normalized to baseline values and the fold change was analyzed.

Rats from both time points formed two distinct groupings, one for the before HS samples and the other for the samples collected three hours after HS. This indicates that the rats experienced distinct alterations in the  $^1\text{H}$ -NMR spectra as a consequence of HS. In all test groups, PLS-DA analysis of the HS and sham animals' spectra immediately before HS or sham treatment showed the same distinct clustering as observed in naïve animals (data not shown). When  $^1\text{H}$ -NMR spectra of plasma samples before and after hemorrhagic shock was analyzed via PLS-DA, clustering of both groups of AGS was distinct from rats. In contrast to rats, both EU- and IBA-AGS, before and after HS overlapped one another without any distinct, segregated clusters (Fig. 1B). We next looked at the  $^1\text{H}$ -NMR spectra of the non-polar molecules. When obtaining spectra of total-plasma, a CPMG relaxation editing sequence was used to suppress the macromolecule signals (including lipids) from obscuring the hydrophilic metabolite peaks. To evaluate the possible contribution of lipid metabolism in AGS resistance to I/R-induced multi organ failure, plasma samples were lipid extracted and PLS-DA was further employed to determine spectral pattern similarities in the non-polar fraction. PLS-DA analysis of the lipophilic components of the plasma samples was conducted on naïve animals of each test group (Fig. 2A) and from samples taken before and three hours after HS (Fig. 2B). For the naïve animals, the lipid spectra for both the EU- and IBA-AGS were clustered together with the exception of an outlier in each group. The AGS clustering was distinct from the rats, which had a more scattered distribution. Lipid  $^1\text{H}$ -NMR spectra was also evaluated before and after HS (Fig. 2B). Unlike the naïve animals, those subject to surgical conditions and HS

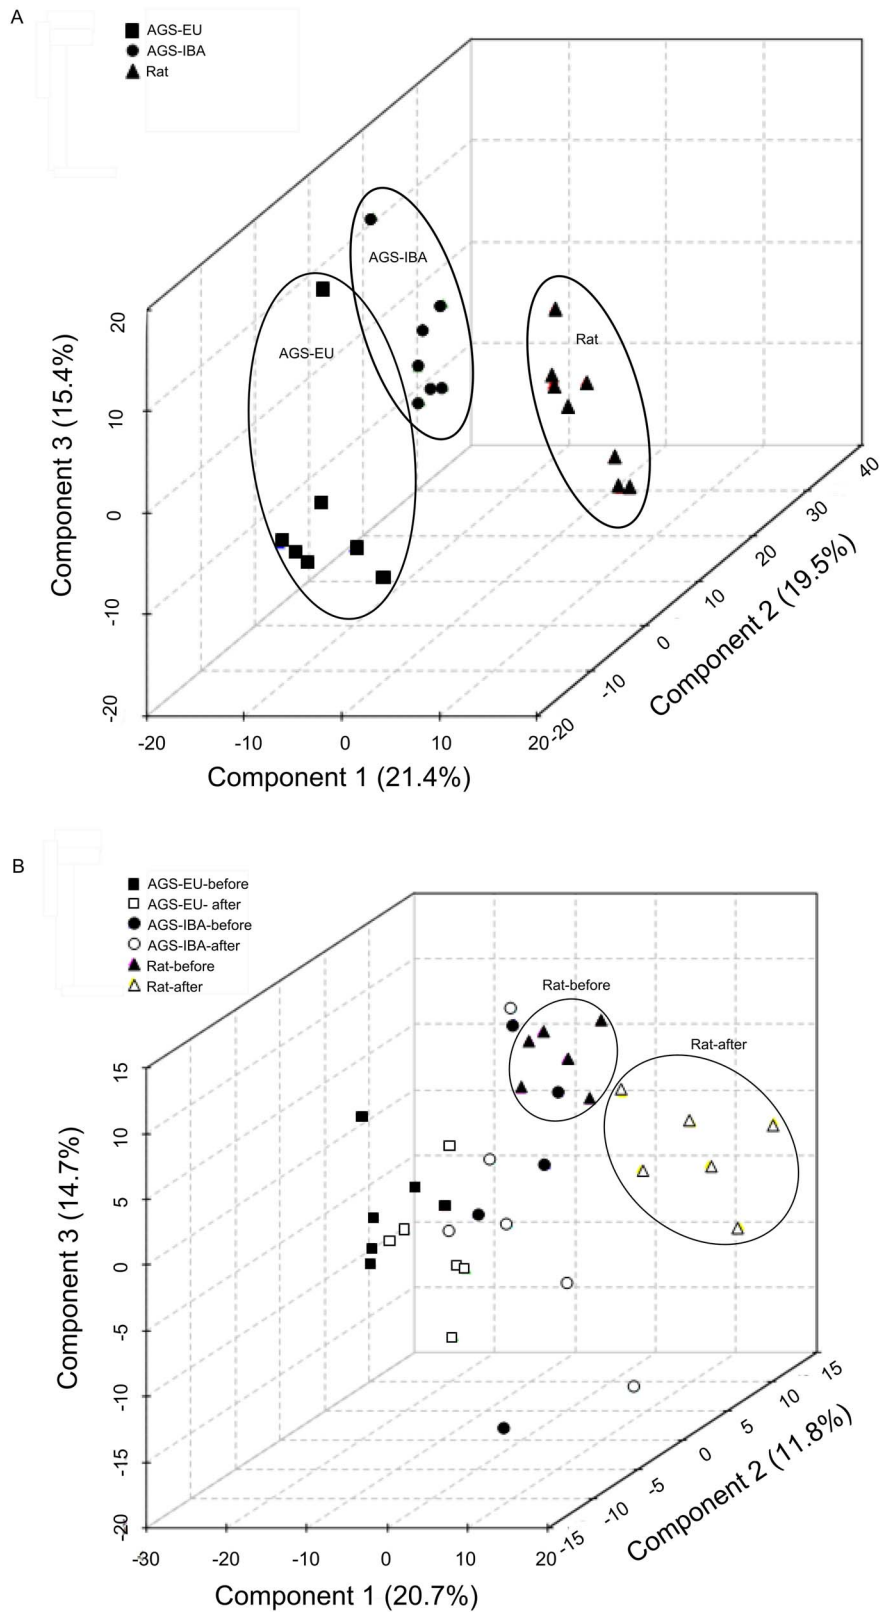

**Figure 1. Hydrophilic metabolic profiles.** A: Hydrophilic metabolic profiles for naive summer euthermic and winter IBA-AGS tended to form distinct clusters separate from each other and the naive rats. However, there was no statistically significant discrimination between the classes ( $R^2 = 1.00$ ,  $Q^2 = 0.79$ , permutation  $p = 0.70$ ) B: I/R injury-prone rats displayed different hydrophilic metabolic profiles before and three hours after hemorrhagic shock ( $R^2 = 0.95$ ,  $Q^2 = 0.79$ , permutation  $p < 0.01$ ). No such clustering was evident for the AGS in either hibernation season. PLS-DA analysis of  $^1\text{H}$  NMR of naive plasma samples (A) or samples from before and after hemorrhagic shock (B). doi:10.1371/journal.pone.0107493.g001

lacked any encapsulated clustering; the rats did not form a distinct grouping but overlapped with the EU-AGS. The EU-AGS grouping crossed into both the rat and IBA-AGS clusters, but the rat and IBA-AGS did not intersect. Within each test group, the spectra before and after HS did not segregate, indicating there was not a spectral pattern difference before and after HS in any of the three groups.

### Changes in circulating metabolite concentrations after hemorrhagic shock

Quantitative analysis of the metabolites identified in the  $^1\text{H-NMR}$  spectra was employed to obtain more specific circulating metabolic profiles of the rats, EU-AGS, and IBA-AGS and to determine any changes in the concentration during I/R. Analysis was conducted on the untreated plasma samples (Fig. 3) and on the lipophilic components of the lipid-extracted samples (Fig. 4). Figures 3 and 4 show representative spectra from naïve animals of each of the groups with peaks used to quantify specific metabolites identified.

A combined total of 32 metabolites were identified in the unprocessed plasma and lipophilic spectra with 25 being found in the unprocessed plasma spectra and seven being identified in the lipophilic spectra. Of the 32 metabolites, only four differed between the naïve rats and AGS (IBA-AGS and EU AGS; Table 1). These were acetate, choline, glutamine and threonine. Rats had higher circulating levels of all of these metabolites save choline, where the AGS had greater concentration. When focusing on changes during I/R, only eight (acetate, glutamine,  $\beta$ -hydroxybutyrate (DBHB), lactate, lysine, tyrosine, alanine, and histidine) had a significant change in concentration from before HS to three hours after HS that was different between group (rat, EU-AGS, or IBA-AGS) and was not found in the sham experiments ( $p < 0.05$ , ANOVA, time  $\times$  group  $\times$  treatment; Table 2; naïve data, Table 1).

Eighteen of these 25 metabolites had a significant concentration change between the start of HS and three hours post-HS. All of these showed a significant difference between rat, EU-AGS, and IBA-AGS ( $p < 0.05$ , ANOVA, time  $\times$  group and time  $\times$  group  $\times$  treatment; Table 2). Of these, only eight show a difference that was due to the HS ( $p < 0.05$ , ANOVA, time  $\times$  group  $\times$  treatment; Table 2). These included acetate, alanine, glutamine, histidine, DBHB, lactate, lysine, and tyrosine. The fold change in these metabolites is shown in Figure 5. The I/R injury-prone rats had greater increases as compared to shams in acetate ( $p = 0.0069$ , 2-way ANOVA, time  $\times$  treatment), lactate ( $p < 0.0001$ , 2-way ANOVA, time  $\times$  treatment), lysine ( $p = 0.0016$ ), tyrosine ( $p = 0.0003$ , 2-way ANOVA, time  $\times$  treatment), alanine ( $p = 0.0002$ , 2-way ANOVA, time  $\times$  treatment), and less of an increase than sham in histidine ( $p = 0.0345$ , 2-way ANOVA, time  $\times$  treatment). The greatest difference was seen in lactate which had a 3.6-fold increase after HS. In contrast, EU-AGS showed significant changes only in a decrease in DBHB ( $p = 0.0245$ , 2-way ANOVA, time  $\times$  treatment), for these metabolites. IBA-AGS showed increases in tyrosine ( $p = 0.0007$ , 2-way ANOVA, time  $\times$  treatment) and alanine ( $p = 0.0245$ , 2-way ANOVA, time  $\times$  treatment), and decreases in glutamine ( $p = 0.0183$ , 2-way ANOVA, time  $\times$  treatment) and DBHB ( $p = 0.0337$ , 2-way ANOVA, time  $\times$  treatment).

### Discussion

This study shows for the first time that during global I/R the metabolic “fingerprint” of the I/R injury-prone rats shifts while those of the AGS remains unaltered. Specifically, rats show

metabolic alterations during global I/R that correspond to an increase in gluconeogenesis, glycolysis and anaerobic metabolism in addition to markers for organ dysfunction. In contrast, EU-AGS maintain stable concentrations of lipophilic and hydrophilic metabolites while IBA-AGS show increases in only two of the metabolites measured, tyrosine and alanine, and a decrease in glutamine and DBHB during HS.

### Species' metabolic differences before I/R

The degree of susceptibility to I/R injury may lie in baseline metabolic differences between I/R injury prone species and those that have innate resistance. Although the naïve rats had differing overall metabolic profiles than the naïve EU- or IBA-AGS, the quantities of metabolites only differed for four metabolites (acetate, choline, glutamine, and threonine). Interestingly, only two of those, acetate and glutamine, also had significant changes due to HS that differed between the rats and AGS. Acetate [33,34] and glutamate [35,36] have been shown to have beneficial effects in rat models of HS. Naïve rats had higher concentrations than AGS in both acetate and glutamate but still had I/R damage after HS. That the rats had I/R damage even though they had higher baseline levels of these protective metabolites, suggests that it is not a variation in metabolic process under neutral conditions that enable the AGS to tolerate I/R, but that protection may stem from metabolic process during I/R that prevent injury.

### Metabolic instability during HS in the I/R injury prone species

In rats, a species vulnerable to I/R injury [11] there were distinct changes in circulating metabolites due to HS. Increased plasma lactate and alanine, two gluconeogenic precursors, during HS indicate active carbohydrate and anaerobic metabolism [37]. These results are consistent with previous studies in our lab that showed that glucose increased in the rat during I/R and for the three hours following reperfusion [11]. Lactate is a well-established herald of poor prognosis after I/R injury [38,39]. It is one of four hydrophilic metabolites (glucose, glutamate, lactate, and DBHB) that have been found by other  $^1\text{H-NMR}$  metabolomic studies on I/R to have a high correlation with morbidity [40,41]. Alanine is also an indicator of dysfunctional lipid metabolism. This study extends these prior studies by showing that these biomarkers of poor prognosis are absent in an I/R injury-resistant species.

### Metabolic homeostasis during I/R in hibernators

Another purpose of this study was to identify changes in circulating metabolites and metabolic profiles that would be indicative of metabolic pathways in the hibernators that might contribute to their innate protective mechanism against I/R injury, systemic inflammation, and multi organ damage. AGS response to I/R was assessed in their summer active season (EU) and during their winter hibernation seasons (IBA) as primary fuel sources switch from a glucose- to lipid-based metabolism, respectively. Despite the seasonal switch in fuel sources in AGS, we have shown that both the IBA- and EU-AGS resist I/R injury (5). Here we demonstrate that the mechanism behind the response is not dependent on seasonal differences in their metabolome but was associated with overall homeostasis. Independence from anaerobic metabolism, indicated by a lack of lactate accumulation also contributed to overall homeostasis. Although differences were noted between EU- and IBA-AGS, the overall fingerprints for both groups were undisturbed by I/R.

Interestingly, the EU-AGS and IBA-AGS data cluster individually, with barely any overlap in naïve animals, but this clustering

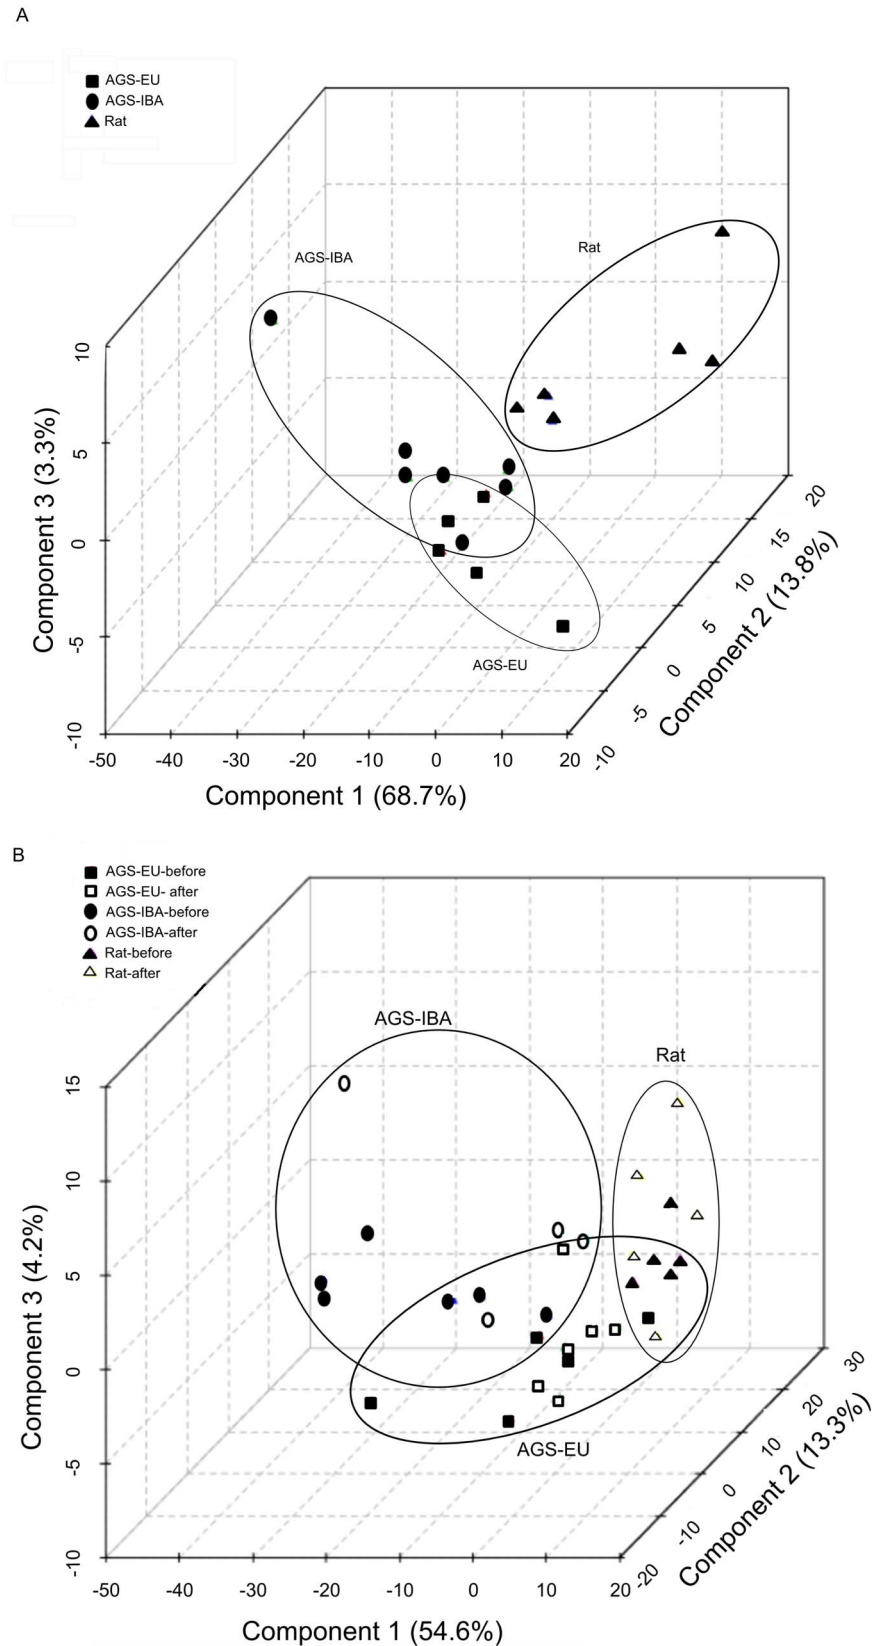

**Figure 2. Lipid metabolic profiles.** A: Lipid metabolic profiles for naïve rat tended to be distinct from summer euthermic and winter IBA AGS while both season of AGS overlapped via PLS-DA analysis of the  $^1\text{H-NMR}$  spectra ( $R^2=0.75$ ,  $Q^2=-0.10$ , permutation  $p=0.12$ ). B: Interbout arousal arctic ground squirrels tended to be distinct from I/R prone rats while euthermic arctic ground squirrels overlapped both rats and interbout arousal squirrels in PLS-DA analysis of  $^1\text{H-NMR}$  lipid-extracted plasma samples before and after hemorrhagic shock ( $R^2=0.70$ ,  $Q^2=-0.02$ , permutation  $p=0.28$ ). For the lipid metabolic profiles, there was not a statistically significant discrimination between the classes.  
doi:10.1371/journal.pone.0107493.g002

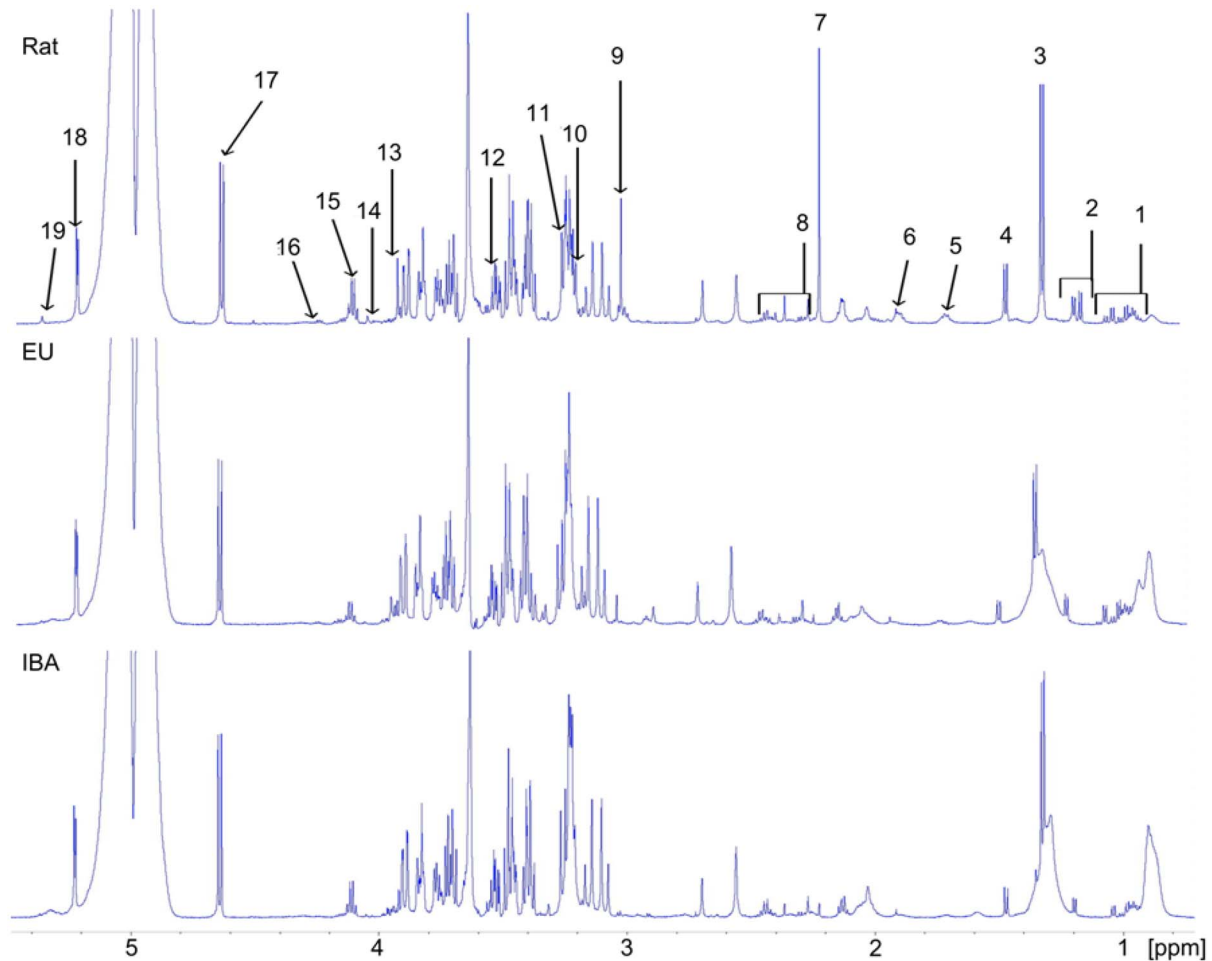

**Figure 3. Representative  $^1\text{H-NMR}$  spectra of unprocessed plasma.** Spectra from naïve rats, summer euthermic (EU) arctic ground squirrel, and winter interbout arousal (IBA) arctic ground squirrels. NMR peak assignments: 1, valine+leucine+isoleucine; 2, DBHB + isobutyrate; 3, lactate + threonine; 4, alanine; 5, lysine; 6, acetate; 7, acetoacetate; 8, glutamine + succinate + pyruvate + glutamate; 9, creatine + creatinine; 10, choline; 11, betaine; 12, glycine; 13, creatine; 14, creatinine; 15, lactate; 16, threonine; 17,  $\beta$ -glucose; 18,  $\alpha$ -glucose; 19, allantoin.  
doi:10.1371/journal.pone.0107493.g003

is lost after surgery (SHS or HS; Fig. 1, Fig. S12). Thus while AGS resist loss of metabolic homeostasis after HS, they do not resist metabolic disturbance caused by surgery alone. This observation emphasizes that the AGS resistance is specific to I/R and not to trauma in general.

Changes in specific metabolites are consistent with low demand for glucose, gluconeogenesis and transport of substrates from peripheral sources to the liver. For example, circulating glutamine, a gluconeogenic precursor, decreased in IBA-AGS during I/R, and the lack of an I/R-induced increase in lactate in AGS of either season indicates that anaerobic metabolism was not utilized in the AGS during I/R. This agrees with previous work showing that an avoidance of lactate build up is a key feature of ischemic preconditioning and that lactate does not accumulate in other models of I/R during the winter season in AGS and other species of hibernating ground squirrels [11,13,27,42–44]. Similarly, the decreases in the fold change of circulating levels of DBHB during hemorrhage in both AGS groups concurs with a low demand for glucose noted previously in IBA and hibernating ground squirrels. Metabolomic fingerprints of IBA- and EU-AGS were consistent with reports from other species showing a metabolic switch during the hibernation season [5–7,14,15,45–48]. Surprisingly, both groups of animals avoided anaerobic glucose metabolism during

I/R, consistent with resistance from I/R injury. DBHB is protective during I/R [49–52], presumably from the ketone bodies direct entrance into the TCA cycle and the avoidance of the conversion of pyruvate to lactate and development of acidosis [53–55]. Similar metabolomes in both groups of AGS suggest that metabolic flexibility persists in AGS during the summer season.

The seasonal shift in metabolism is consistent with other studies in other species of ground squirrels; however, the specific metabolites differed from these other studies. The seasonal differences in hydrophilic metabolites between summer and winter AGS reported here vary from those previously reported from  $^1\text{H-NMR}$  analysis. Serkova et al. found that lactate and alanine concentrations were higher in summer versus IBA ground squirrels [13]. However, that study was focused on monitoring metabolic changes in the liver during hibernation cycles in ground squirrels. The differences noted could be due to the tissue examined (liver versus plasma). It may also be due to the fact that the IBA animals used in the current study were completely euthermic and showed no signs (e.g. reduced body temperature) of entering into a torpor bout. In contrast, Serkova and colleagues specifically used IBA animals that dropped core body temperature and were beginning to enter torpor. Previous studies have shown proteomic and metabolomic differences between normothermic IBA animals and

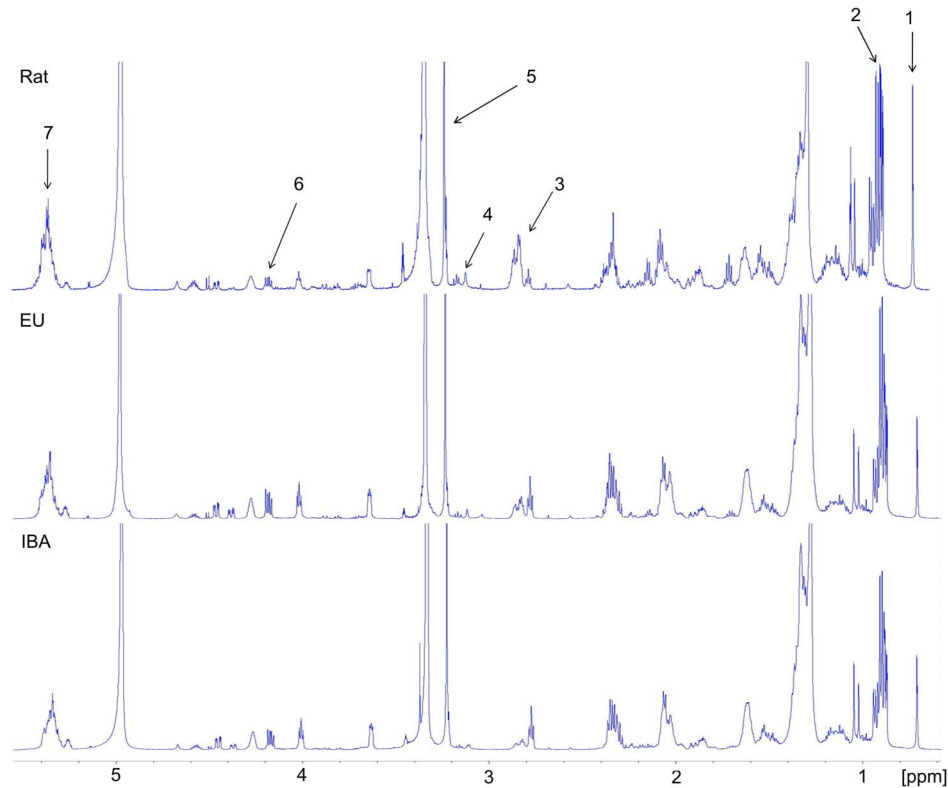

**Figure 4. Representative  $^1\text{H}$ -NMR spectra of plasma lipid extract samples.** Spectra from naïve rats, summer euthermic (EU) arctic ground squirrel, and winter interbout arousal (IBA) arctic ground squirrels. NMR peak assignments: 1, cholesterol; 2, total triglycerides; 3, PUFA, polyunsaturated fatty acids; 4, phosphatidyl ethanolamine; 5, cholines; 6, TAG, triacylglycerol; 7, UFA, unsaturated fatty acids. doi:10.1371/journal.pone.0107493.g004

those who are in various stages of torpor [19–21]. In this study, we used normothermic IBA animals, which had been handled gently ~20 hours prior to the start of the experiment to induce arousal. This was done for two reasons: 1) to examine endogenous I/R protective mechanisms outside those of reduced body temperature, and 2) to avoid confounding results stemming from torpid animals that have vastly depressed cardiovascular, respiratory, and metabolic rates [56,57].

#### Lipid metabolome remains unaltered during hemorrhagic shock

With regard to lipophilic metabolites, we did not see significant differences between summer and winter season ground squirrels noted by others [13,16], likely due to differences in study design as discussed above. However, there was a difference between the two species with rats having lower levels of lipophilic metabolites than either AGS in either season overall. Others have demonstrated that products of lipid metabolism are protective during I/R [51,52,58,59]. As there was no significant change in any of the lipophilic metabolites from before to after HS within a group (rats, IBA-AGS, and EU-AGS), it is unlikely that these contributed to protective biochemical mechanisms in the AGS or injurious mechanisms in the rat. There is a well-documented difference in lipid metabolism between summer euthermic and winter ground squirrels [6,13–22,60]. With  $^1\text{H}$ -NMR analysis of lipophilic metabolites, Serkova et al. found that only polyunsaturated fatty acids (PUFA) levels were greater in IBA versus summer animals. However, most of the differences in the lipophilic metabolites were between summer and torpid animals [13]. Epperson et al. found that cholesterol levels in plasma were higher in IBA versus summer

animals [16]. In the current study, the IBA animals tended to have higher cholesterol levels, but the difference was not significant. These discrepancies are most likely due to high variation between individuals in each group due to differences in IBA duration and how far along in the process each animal was. In both of the previous studies, IBA animals were studied at different time points within the IBA process (entrance into torpor and 3 hours after euthermic body temperature was reached), in a synchronized fashion. During each IBA, the animal goes through many dynamic physiological and biochemical alterations that are specific to the arousal/torpor cycle [16,19,21]. The present study sought to examine metabolic mechanisms that differ between the summer and winter season, versus between the IBA and torpid state. As such, IBAs were not synchronized for experiments which might contribute to the higher variation in metabolite concentrations in this group.

#### Organ damage markers

In addition to flagging alterations in metabolic pathways and preferential fuel sources, increases in several of the metabolites are established as biomarkers for organ damage or dysfunction [27,40,43,61,62]. The I/R injury prone rats had increases in lactate, tyrosine, lysine, and acetate, markers of hepatic injury (Table 3; Fig. 5). Lactate, a sign for anaerobic metabolism is also a marker of liver dysfunction and decreased ability of the liver to clear circulating excess lactate from the blood stream [63]. The same is true of tyrosine, lysine, and acetate. Increases in lactate and amino acids, such as tyrosine and lysine, are indicative of decreased hepatic function [61] as is an increase in acetate, one of the major endpoints in several hepatic metabolic pathways [43].



**Table 1.** Average concentrations (mM plasma) and SEM of metabolites in naïve animals for summer euthermic (EU) arctic ground squirrels, winter interbout arousal (IBA) arctic ground squirrels, and rats.

|                                               | Naïve EU-AGS               | Naïve IBA-AGS              | Naïve Rat                  | ANOVA p |
|-----------------------------------------------|----------------------------|----------------------------|----------------------------|---------|
| Hydrophilic metabolites by <sup>1</sup> H-NMR |                            |                            |                            |         |
| Acetoacetate                                  | 0.095±0.209                | 0.459±0.772                | 0.096±0.185                | 0.088   |
| Acetate                                       | 0.110±0.009 <sup>a</sup>   | 0.078±0.005 <sup>a</sup>   | 0.190±0.013 <sup>b</sup>   | <0.0001 |
| Alanine                                       | 0.454±0.086 <sup>a,b</sup> | 0.346±0.040 <sup>a</sup>   | 0.625±0.040 <sup>b</sup>   | 0.001   |
| Allantoin                                     | 0.218±0.073                | 0.232±0.052                | 0.138±0.019                | 0.372   |
| Betaine                                       | 1.004±0.151 <sup>a</sup>   | 0.877±0.081 <sup>a,b</sup> | 0.570±0.043 <sup>b</sup>   | 0.014   |
| Choline                                       | 0.646±0.053 <sup>a</sup>   | 0.726±0.045 <sup>a</sup>   | 0.462±0.034 <sup>b</sup>   | 0.001   |
| Creatinine                                    | 0.125±0.209                | 0.105±0.178                | 0.111±0.164                | 0.834   |
| Creatine                                      | 0.217±0.019                | 0.168±0.027                | 0.225±0.012                | 0.105   |
| Formate                                       | 0.199±0.013                | 0.152±0.008                | 0.141±0.025                | 0.079   |
| Glutamate                                     | 0.229±0.223                | 0.248±0.225                | 0.252±0.160                | 0.561   |
| Glutamine                                     | 1.118±0.099 <sup>a</sup>   | 1.098±0.093 <sup>a</sup>   | 2.022±0.045 <sup>b</sup>   | <0.0001 |
| Glycine                                       | 0.712±0.062                | 0.839±0.072                | 0.735±0.066                | 0.387   |
| Histidine                                     | 0.076±0.007                | 0.086±0.006                | 0.066±0.006                | 0.112   |
| β-hydroxybutyrate                             | 0.442±0.095                | 0.668±0.240                | 0.161±0.016                | 0.061   |
| Isobutyrate                                   | 3.591±2.932                | 0.129±0.218                | 0.170±0.410                | 0.321   |
| Isoleucine                                    | 0.199±0.053                | 0.130±0.019                | 0.127±0.007                | 0.215   |
| Lactate                                       | 1.808±0.219                | 1.943±0.144                | 2.227±0.222                | 0.335   |
| Leucine                                       | 0.441±0.099                | 0.359±0.004                | 0.273±0.011                | 0.164   |
| Lysine                                        | 0.461±0.387                | 0.380±0.279                | 0.470±0.186                | 0.181   |
| Phenylalanine                                 | 0.074±0.009                | 0.063±0.008                | 0.090±0.009                | 0.106   |
| Pyruvate                                      | 0.148±0.008 <sup>a</sup>   | 0.108±0.010 <sup>b</sup>   | 0.146±0.009 <sup>a</sup>   | 0.011   |
| Succinate                                     | 0.046±0.118                | 0.072±0.217                | 0.039±0.058                | 0.079   |
| Threonine                                     | 0.433±0.047 <sup>a</sup>   | 0.440±0.058 <sup>a</sup>   | 0.608±0.037 <sup>b</sup>   | 0.023   |
| Tyrosine                                      | 0.156±0.024 <sup>a</sup>   | 0.083±0.011 <sup>b</sup>   | 0.116±0.014 <sup>a,b</sup> | 0.025   |
| Valine                                        | 0.308±0.046 <sup>a</sup>   | 0.214±0.014 <sup>a,b</sup> | 0.210±0.005 <sup>b</sup>   | 0.030   |
| Lipophilic metabolites by <sup>1</sup> H-NMR  |                            |                            |                            |         |
| TAG                                           | 10.687±6.183               | 11.682±3.544               | 1.903±0.340                | 0.211   |
| Cholines                                      | 6.630±1.097 <sup>a,b</sup> | 11.547±3.239 <sup>a</sup>  | 2.405±0.603 <sup>b</sup>   | 0.032   |
| PUFA                                          | 11.939±2.286               | 12.248±3.498               | 6.465±1.068                | 0.256   |
| Total Triglycerides                           | 64.594±30.525              | 84.074±22.556              | 15.428±2.157               | 0.108   |
| Cholesterol                                   | 4.968±1.210 <sup>a,b</sup> | 9.417±2.144 <sup>a</sup>   | 1.904±0.223 <sup>b</sup>   | 0.010   |
| Phosphatidyl Ethanolamine                     | 1.080±0.244                | 2.167±0.579                | 1.492±0.348                | 0.230   |
| UFA                                           | 51.794±23.843              | 64.400±17.948              | 15.193±2.647               | 0.190   |

Average concentrations (mM plasma) ± S.E.M. of metabolites for naïve summer euthermic (EU) arctic ground squirrels, winter interbout arousal (IBA) arctic ground squirrels, and rats. TAG, triacylglycerol; PUFA, Polyunsaturated fatty acids. n=6–7 for all groups. ANOVA value and significant differences (p<0.05, Tukey) are indicated by differing superscript letters.

doi:10.1371/journal.pone.0107493.t001

These results agree with previous studies in our lab that have shown from standard blood chemistry analysis that after HS, rats have increased serum markers for liver damage (aspartate aminotransferase; AST, and alanine aminotransferase; ALT [11]). Meanwhile, EU-AGS did not have an increase in any of the markers for organ damage after HS. Although IBA-AGS showed an increase in tyrosine, a marker for liver dysfunction, the increase was much less than observed in rats, consistent with absence of organ damage noted previously [11].

Previous studies have shown a difference in I/R tolerance between summer- and winter-season ground squirrels [5–7,64]. These experiments have been performed on various isolated tissue preparations and have demonstrated resistance to I/R injury in

winter, but not summer animals for liver, kidney, and small intestine. In contrast, our previous report detailed that both IBA- and EU-AGS were resistant to systemic inflammation and multi organ damage after global I/R [11]. Similarly, the brains of spring/summer euthermic ground squirrels have been shown to be resistant to I/R injury [10,65]. As NMR is a relatively insensitive method that requires ~2–4 mM of metabolites for detection, some metabolic perturbations may require more than three hours to reach detectable concentrations [41]. For example, allantoin, a marker for renal damage, has been found only to be distinguishable in the blood 24 hours after I/R [27]. In this study, allantoin levels differed between the treatment groups, but were not different between sham and hemorrhaged animals, perhaps

**Table 2.** Average concentrations (mM plasma) and SEM of metabolites for summer euthermic (EU) arctic ground squirrels, winter interbout arousal (IBA) arctic ground squirrels, and rats immediately before and three hours after hemorrhagic shock (HS) or sham (SHS).

| Metabolite                                    | ppm  | Trt | EU-AGS      |             | IBA-AGS     |              | Rat         |             | ANOVA <i>p</i> | Interaction or Main Effect |
|-----------------------------------------------|------|-----|-------------|-------------|-------------|--------------|-------------|-------------|----------------|----------------------------|
|                                               |      |     | Before      | After       | Before      | After        | Before      | After       |                |                            |
| Hydrophilic metabolites by <sup>1</sup> H-NMR |      |     |             |             |             |              |             |             |                |                            |
| Acetate                                       | 1.91 | HS  | 0.075±0.018 | 0.086±0.011 | 0.090±0.009 | 0.097±0.009  | 0.165±0.011 | 0.028±0.023 | 0.0009         | time × group × treatment   |
|                                               |      | SHS | 0.079±0.011 | 0.099±0.006 | 0.075±0.006 | 0.082±0.011  | 0.153±0.010 | 0.170±0.023 |                |                            |
| Alanine                                       | 1.47 | HS  | 0.357±0.055 | 0.683±0.104 | 0.551±0.152 | 0.940±0.180  | 0.770±0.078 | 1.945±0.195 | 0.0007         | time × group × treatment   |
|                                               |      | SHS | 0.479±0.067 | 0.640±0.094 | 0.316±0.031 | 0.394±0.333  | 0.763±0.066 | 0.926±0.159 |                |                            |
| Glutamine                                     | 2.44 | HS  | 1.150±0.123 | 1.446±0.049 | 2.753±0.353 | 2.214±0.094  | 1.740±0.075 | 1.958±0.055 | 0.0086         | time × group × treatment   |
|                                               |      | SHS | 1.122±0.069 | 1.472±0.102 | 2.936±0.668 | 3.585±0.643  | 1.605±0.090 | 1.882±0.081 |                |                            |
| Histidine                                     | 7.05 | HS  | 0.073±0.010 | 0.090±0.008 | 0.070±0.007 | 0.082±0.010  | 0.059±0.007 | 0.064±0.019 | 0.0126         | time × group × treatment   |
|                                               |      | SHS | 0.086±0.008 | 0.094±0.011 | 0.085±0.007 | 0.067±0.018  | 0.068±0.003 | 0.115±0.007 |                |                            |
| DBHB                                          | 1.20 | HS  | 0.238±0.068 | 0.334±0.057 | 1.765±0.683 | 0.861±0.252  | 0.894±0.043 | 0.747±0.042 | 0.0329         | time × group × treatment   |
|                                               |      | SHS | 0.264±0.059 | 0.493±0.063 | 2.883±1.093 | 3.576±1.111  | 0.924±0.118 | 0.960±0.215 |                |                            |
| Lactate                                       | 4.11 | HS  | 1.768±0.235 | 3.402±0.611 | 2.291±0.231 | 3.674±0.421  | 1.665±0.069 | 7.573±0.431 | <0.0001        | time × group × treatment   |
|                                               |      | SHS | 2.497±0.406 | 3.124±0.379 | 2.123±0.105 | 2.189±0.231  | 1.972±0.204 | 3.537±0.500 |                |                            |
| Tyrosine                                      | 6.88 | HS  | 0.069±0.009 | 0.109±0.026 | 0.035±0.008 | 0.037±0.008  | 0.054±0.007 | 0.201±0.036 | 0.0002         | time × group × treatment   |
|                                               |      | SHS | 0.060±0.005 | 0.074±0.013 | 0.050±0.005 | 0.034±0.007  | 0.058±0.003 | 0.058±0.009 |                |                            |
| Lysine                                        | 1.71 | HS  | 0.471±0.042 | 0.674±0.050 | 0.583±0.139 | 0.523±0.048  | 0.754±0.061 | 1.513±0.087 | 0.0032         | time × group × treatment   |
|                                               |      | SHS | 0.483±0.043 | 0.593±0.038 | 0.440±0.051 | 0.5234±0.048 | 0.677±0.072 | 0.838±0.166 |                |                            |
| Succinate                                     | 2.40 | HS  | 0.034±0.005 | 0.058±0.008 | 0.153±0.059 | 0.094±0.019  | 0.109±0.004 | 0.226±0.024 | <0.0001        | time × group               |
|                                               |      | SHS | 0.033±0.004 | 0.054±0.006 | 0.340±0.106 | 0.2454±0.087 | 0.105±0.009 | 0.143±0.020 |                |                            |
| Allantoin                                     | 5.37 | HS  | 0.124±0.013 | 0.187±0.020 | 0.696±0.391 | 0.475±0.118  | 0.081±0.008 | 0.409±0.023 | 0.0405         | time × group               |
|                                               |      | SHS | 0.232±0.070 | 0.248±0.042 | 0.239±0.030 | 0.189±0.033  | 0.096±0.010 | 0.252±0.040 |                |                            |
| Betaine                                       | 3.27 | HS  | 1.120±0.308 | 1.191±0.302 | 1.158±0.154 | 1.017±0.054  | 0.814±0.186 | 2.176±0.379 | 0.0079         | time × group               |
|                                               |      | SHS | 0.838±0.072 | 0.826±0.089 | 0.843±0.093 | 1.316±0.599  | 0.549±0.056 | 1.033±0.125 |                |                            |
| Formate                                       | 8.45 | HS  | 0.174±0.108 | 0.196±0.035 | 0.266±0.056 | 0.564±0.066  | 0.162±0.021 | 0.178±0.026 | 0.0001         | time × group               |
|                                               |      | SHS | 0.084±0.008 | 0.238±0.055 | 0.268±0.019 | 0.480±0.031  | 0.156±0.023 | 0.191±0.018 |                |                            |
| Phenylalanine                                 | 7.31 | HS  | 0.105±0.014 | 0.177±0.024 | 0.080±0.014 | 0.104±0.006  | 0.118±0.010 | 0.249±0.026 | <0.0001        | time × group               |
|                                               |      | SHS | 0.094±0.009 | 0.127±0.009 | 0.073±0.008 | 0.062±0.005  | 0.109±0.003 | 0.162±0.009 |                |                            |
| Pyruvate                                      | 2.36 | HS  | 0.129±0.020 | 0.198±0.026 | 0.185±0.027 | 0.224±0.024  | 0.140±0.006 | 0.321±0.012 | <0.0001        | time × group               |
|                                               |      | SHS | 0.127±0.018 | 0.195±0.026 | 0.108±0.010 | 0.141±0.013  | 0.156±0.018 | 0.257±0.031 |                |                            |
| Creatinine                                    | 4.05 | HS  | 0.093±0.033 | 0.092±0.017 | 0.094±0.019 | 0.109±0.021  | 0.059±0.015 | 0.251±0.021 | 0.0002         | time × group               |
|                                               |      | SHS | 0.167±0.029 | 0.215±0.056 | 0.154±0.019 | 0.114±0.044  | 0.096±0.021 | 0.197±0.025 |                |                            |
| Valine                                        | 1.04 | HS  | 0.316±0.046 | 0.446±0.031 | 0.295±0.055 | 0.278±0.034  | 0.341±0.021 | 0.396±0.033 | 0.0005         | time × group               |
|                                               |      | SHS | 0.332±0.034 | 0.167±0.029 | 0.206±0.019 | 0.233±0.013  | 0.309±0.028 | 0.283±0.013 |                |                            |
| Creatine                                      | 3.93 | HS  | 0.425±0.071 | 0.675±0.181 | 0.408±0.075 | 0.349±0.032  | 0.452±0.023 | 1.215±0.070 | <0.0001        | time group                 |
|                                               |      | SHS | 0.412±0.024 | 0.568±0.049 | 0.374±0.034 | 0.382±0.065  | 0.474±0.021 | 0.951±0.085 |                |                            |
| Glutamate                                     | 2.34 | HS  | 0.169±0.014 | 0.231±0.011 | 0.455±0.119 | 0.365±0.039  | 0.294±0.021 | 0.508±0.043 | <0.0001        | time × group               |
|                                               |      | SHS | 0.210±0.029 | 0.259±0.028 | 0.359±0.024 | 0.281±0.024  | 0.279±0.024 | 0.350±0.026 |                |                            |
| Acetoacetate                                  | 2.22 | HS  | 0.560±0.089 | 1.086±0.177 | 0.870±0.212 | 1.633±0.419  | 1.030±0.166 | 1.994±0.254 | 0.0073         | time × treatment           |
|                                               |      | SHS | 0.723±0.151 | 1.753±0.419 | 1.838±0.177 | 3.942±0.637  | 1.110±0.138 | 3.320±0.752 |                |                            |

Table 2. Cont.

| Metabolite                                   | ppm  | Trt | EU-AGS        |               | IBA-AGS        |                | Rat          |              | ANOVA<br><i>p</i> | Interaction<br>or Main<br>Effect |
|----------------------------------------------|------|-----|---------------|---------------|----------------|----------------|--------------|--------------|-------------------|----------------------------------|
|                                              |      |     | Before        | After         | Before         | After          | Before       | After        |                   |                                  |
| Cholines                                     | 3.21 | HS  | 0.725±0.213   | 0.651±0.064   | 0.535±0.073    | 0.535±0.032    | 0.289±0.022  | 0.380±0.032  | <0.0001           | group                            |
|                                              |      | SHS | 0.834±0.085   | 0.894±0.096   | 0.829±0.060    | 0.745±0.053    | 0.313±0.011  | 0.391±0.023  |                   |                                  |
| Glycine                                      | 3.55 | HS  | 0.670±0.164   | 1.055±0.049   | 1.537±0.271    | 1.372±0.107    | 1.408±0.103  | 1.649±0.077  | 0.0021            | group                            |
|                                              |      | SHS | 0.696±0.161   | 0.899±0.149   | 0.719±0.144    | 1.135±0.283    | 1.123±0.193  | 1.403±0.157  |                   |                                  |
| Threonine                                    | 4.24 | HS  | 0.475±0.114   | 0.542±0.082   | 0.329±0.051    | 0.319±0.050    | 0.399±0.070  | 0.658±0.085  | 0.0122            | group                            |
|                                              |      | SHS | 0.603±0.089   | 0.662±0.095   | 0.497±0.065    | 0.325±0.136    | 0.469±0.047  | 0.512±0.051  |                   |                                  |
| Isoleucine                                   | 1.01 | HS  | 0.160±0.015   | 0.227±0.012   | 0.399±0.204    | 0.272±0.061    | 0.186±0.013  | 0.188±0.015  | n/a               |                                  |
|                                              |      | SHS | 0.194±0.026   | 0.232±0.024   | 0.119±0.019    | 0.137±0.012    | 0.163±0.015  | 0.141±0.005  |                   |                                  |
| Isobutyrate                                  | 1.17 | HS  | 0.223±0.083   | 0.236±0.091   | 0.524±0.119    | 0.524±0.127    | 1.105±0.332  | 0.647±0.121  | n/a               |                                  |
|                                              |      | SHS | 0.777±0.349   | 2.963±1.921   | 0.957±0.319    | 1.560±0.640    | 1.319±0.324  | 2.205±0.997  |                   |                                  |
| Leucine                                      | 0.96 | HS  | 0.390±0.047   | 0.509±0.029   | 0.778±0.346    | 0.569±0.108    | 0.377±0.022  | 0.433±0.032  | n/a               |                                  |
|                                              |      | SHS | 0.437±0.057   | 0.489±0.039   | 0.330±0.045    | 0.331±0.022    | 0.349±0.028  | 0.317±0.012  |                   |                                  |
| Lipophilic metabolites by <sup>1</sup> H-NMR |      |     |               |               |                |                |              |              |                   |                                  |
| Total Triglycerides                          | 0.87 | HS  | 24.433±6.322  | 33.194±5.831  | 101.047±26.995 | 168.324±71.707 | 16.813±2.778 | 11.310±1.180 | 0.0004            | group                            |
|                                              |      | SHS | 77.615±40.553 | 73.733±21.553 | 70.655±13.842  | 69.278±19.516  | 21.048±4.796 | 24.020±6.859 |                   |                                  |
| Cholesterol                                  | 0.70 | HS  | 3.156±0.775   | 4.144±0.719   | 10.115±2.288   | 13.042±5.152   | 2.383±0.412  | 1.716±0.212  | 0.0012            | group                            |
|                                              |      | SHS | 6.500±2.259   | 7.594±1.950   | 8.118±1.6411   | 7.847±2.092    | 3.105±0.820  | 3.999±1.303  |                   |                                  |
| PUFA                                         | 2.85 | HS  | 6.482±1.914   | 8.055±1.092   | 12.278±2.417   | 17.120±7.362   | 7.840±1.403  | 5.217±0.658  | n/a               |                                  |
|                                              |      | SHS | 13.126±5.265  | 15.178±3.400  | 10.684±2.931   | 10.937±2.931   | 9.460±2.440  | 12.453±4.016 |                   |                                  |
| TAG                                          | 4.17 | HS  | 2.889±0.811   | 3.858±0.753   | 14.737±4.901   | 27.610±12.470  | 1.446±0.283  | 1.044±0.158  | n/a               |                                  |
|                                              |      | SHS | 12.421±7.879  | 10.259±3.442  | 9.348±1.859    | 9.166±2.675    | 1.773±0.411  | 2.120±0.601  |                   |                                  |
| Phosphotidyl Ethanolamine                    | 3.10 | HS  | 1.590±0.523   | 1.396±0.209   | 3.004±0.710    | 3.205±1.611    | 1.503±0.294  | 1.106±0.490  | n/a               |                                  |
|                                              |      | SHS | 2.209±1.093   | 2.968±0.778   | 2.173±0.750    | 2.090±0.372    | 1.531±0.646  | 1.908±0.513  |                   |                                  |
| Cholines                                     | 3.23 | HS  | 4.148±1.100   | 5.491±0.851   | 12.440±2.804   | 14.731±6.734   | 2.222±0.282  | 1.668±0.246  | n/a               |                                  |
|                                              |      | SHS | 8.510±2.815   | 10.543±2.911  | 11.330±2.605   | 10.872±3.205   | 1.904±0.512  | 3.655±0.850  |                   |                                  |
| UFA                                          | 5.35 | HS  | 19.306±5.049  | 25.757±4.356  | 75.364±20.803  | 130.103±57.518 | 14.479±2.837 | 10.251±1.584 | n/a               |                                  |
|                                              |      | SHS | 61.280±34.619 | 59.608±19.031 | 53.775±10.450  | 53.164±15.240  | 13.466±4.007 | 26.537±6.486 |                   |                                  |

Group was defined as EU-AGS vs. IBA-AGS vs. rat. Treatment indicated sham vs. hemorrhagic shock. For all lipophilic parameters, difference in group was IBA>rat. ANOVA analysis included sham surgery animals as a treatment. n=5–7 for all groups. ANOVA value and significant differences (*p*<0.05, Tukey) are indicated. TAG, triacylglycerol; PUFA, Polyunsaturated fatty acids; UFA, unsaturated fatty acids. doi:10.1371/journal.pone.0107493.t002

pointing to some low-level renal dysfunction that was associated with the surgical procedure itself.

For metabolomic analysis, plasma is considered the biofluid of choice [41] and is well established for the evaluation of the metabolic status of various organs [40]. In principle, it represents an “average” physiological biochemical status of the organism as it interacts with all of the various tissues and organs. However, hibernating animals have the ability to regulate blood flow away from peripheral regions during hibernation and arousal [66–69]. Also, given the complexity of the hemodynamics during hemorrhage, there may be differential perfusion to various organs over the time course. Both of these factors may have affected the levels of metabolites that specific organs contributed to the plasma that was analyzed. In addition, EDTA was used as an anticoagulant. EDTA produces NMR peaks that can obscure detection of certain metabolites [70]. However, most of these metabolites can be quantified based on peaks in regions clear of the anticoagulant peaks [71].

## Conclusion

Systemic I/R injury, such as occurs in HS, is a leading cause of death in trauma patients [40]. Lack of oxygen and nutrients in conjunction with buildup of waste products during the ischemic period, followed by the inrush of oxygen and the generation of reactive oxygen species (ROS) during reperfusion induces metabolic alterations at the cellular level. By analyzing the metabolites and metabolic profile of a species known to be prone to I/R damage, both before and after I/R insult, we were able to establish biomarkers of metabolic perturbations and organ damage that precede HS-induced fatality. By then comparing the metabolic profile of the I/R-resistant AGS to these biomarkers, we discovered that, unlike the I/R injury prone rats, which experience distinct alterations in their metabolome during I/R, AGS are able to sustain their lipophilic and hydrophilic metabolic profiles. Specifically, AGS resist changes to metabolites involved in carbohydrate turnover, anaerobic metabolism, and organ

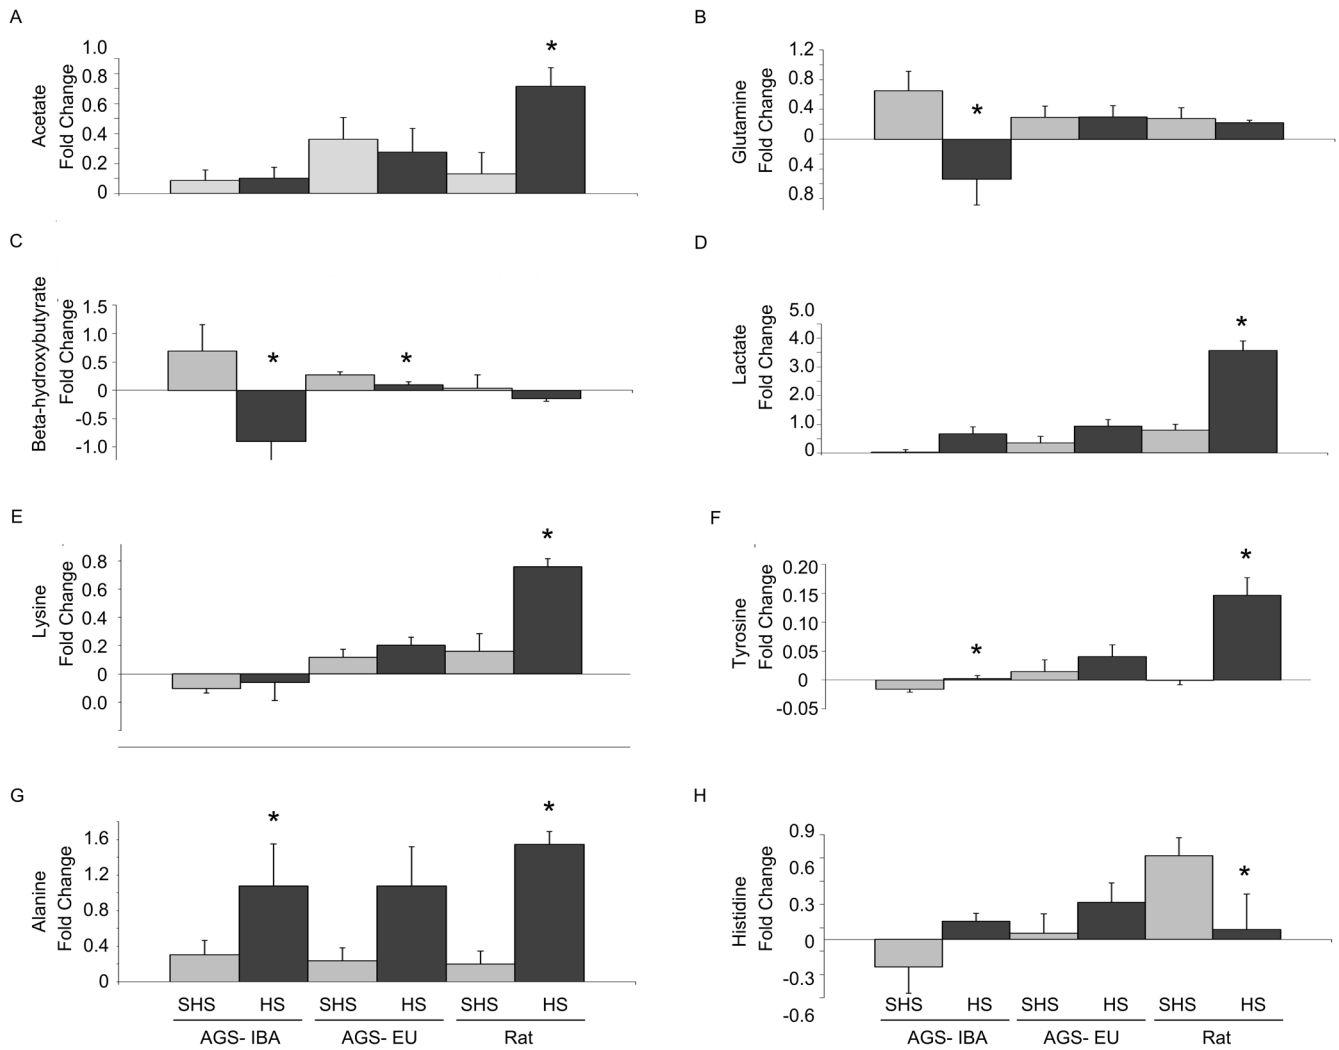

**Figure 5. Fold change in plasma metabolites before and after hemorrhagic shock.** Fold change in circulating metabolites before and after hemorrhagic shock (HS) or sham hemorrhagic shock (SHS) in winter interbout arousal (IBA) arctic ground squirrels, summer euthermic (EU) arctic ground squirrels, and rats. Data presented as mean  $\pm$  SEM. Asterisks indicate  $p < 0.05$  vs. SHS of same group, Tukey test.  $n = 6-8$  for all groups. Concentrations of metabolites are shown in Table 2. doi:10.1371/journal.pone.0107493.g005

dysfunction. This information suggests that the underlying factors involved in I/R resistance in these animals is not based in the seasonal switch in energy source from carbohydrate in the summer to lipid in the winter but in the maintenance of metabolic homeostasis. The stability of their metabolome during the period of limited nutrient and oxygen availability indicates that they may

have better metabolic regulatory and/or compensatory mechanisms not utilized by homothermic species. These metabolic mechanisms could provide potential therapeutic interventions to alleviate the metabolic imbalances and subsequent inflammatory response and organ damage associated with global I/R.

**Table 3.**  $^1\text{H-NMR}$  plasma biomarkers predictive of poor prognosis after hemorrhagic shock-induced global ischemia/reperfusion injury.

| Anaerobic Metabolism | Carbohydrate Turnover | Liver Dysfunction   |
|----------------------|-----------------------|---------------------|
| $\uparrow$ Lactate   | $\uparrow$ Lactate    | $\uparrow$ Lactate  |
|                      | $\uparrow$ Acetate    | $\uparrow$ Acetate  |
|                      |                       | $\uparrow$ Tyrosine |
|                      |                       | $\uparrow$ Lysine   |

doi:10.1371/journal.pone.0107493.t003

## Supporting Information

**Figure S1 Experimental protocol for hemorrhagic shock.** Core body temperature and head temperature were maintained between 36.5 and 37.5°C with a warm water blanket under the animal and heat lamps above the animal from the start of surgical preparation until the end of post HS monitoring. Arrows indicate blood sampling timepoints. Hemorrhagic shock (HS); mean arterial pressure (MAP). (TIF)

**Figure S2 H-C-HMQC verifying the identity of Acetate at 1.91 ppm, from extracted naïve rat sample to aid in peak identification.** (TIF)

**Figure S3 <sup>1</sup>H-CPMG of unprocessed rat plasma.** (TIF)

**Figure S4 H-H-COSY of hydrophilic fraction of extracted naïve rat sample to aid in peak identification.** (TIF)

**Figure S5 H-H-COSY of hydrophilic fraction of extracted naïve rat sample to aid in peak identification.** (TIF)

**Figure S6 H-C-HMQC of hydrophilic fraction of extracted naïve rat sample to aid in peak identification.** (TIF)

**Figure S7 H-C-HMQC of hydrophilic fraction of extracted naïve rat sample to aid in peak identification.** (TIF)

**Figure S8 H-C-HMQC of hydrophilic fraction of extracted naïve rat sample to aid in peak identification.** (TIF)

**Figure S9 <sup>1</sup>H-CPMG of unprocessed AGS plasma to aid in peak identification.** (TIF)

**Figure S10 H-C-HSQC from unprocessed AGS plasma to aid in peak identification.** (TIF)

## References

- Scribner DM, Witowski NE, Mulier KE, Lusczek ER, Wasiluk KR, et al. (2010) Liver metabolomic changes identify biochemical pathways in hemorrhagic shock. *J Surg Res* 164: e131–139.
- Lee JH, Kim SC, Lee TH, Chung SW, No HW, et al. (2008) Preliminary study on physiological changes of hemorrhagic shock in rats. *Conf Proc IEEE Eng Med Biol Soc* 2008: 4891–4894.
- Mongardon N, Dumas F, Ricome S, Grimaldi D, Hissem T, et al. (2011) Postcardiac arrest syndrome: from immediate resuscitation to long-term outcome. *Ann Intensive Care* 1: 45.
- Raedschelders K, Ansley DM, Chen DD (2012) The cellular and molecular origin of reactive oxygen species generation during myocardial ischemia and reperfusion. *Pharmacol Ther* 133: 230–255.
- Kurtz CC, Lindell SL, Mangino MJ, Carey HV (2006) Hibernation confers resistance to intestinal ischemia-reperfusion injury. *Am J Physiol Gastrointest Liver Physiol* 291: G895–901.
- Martin SL, Epperson LE, Rose JC, Kurtz CC, Ane C, et al. (2008) Proteomic analysis of the winter-protected phenotype of hibernating ground squirrel intestine. *Am J Physiol Regul Integr Comp Physiol* 295: R316–328.
- Lindell SL, Klahn SL, Piazza TM, Mangino MJ, Torrealba JR, et al. (2005) Natural resistance to liver cold ischemia-reperfusion injury associated with the hibernation phenotype. *Am J Physiol Gastrointest Liver Physiol* 288: G473–480.
- Jani A, Epperson E, Martin J, Pacic A, Ljubanovic D, et al. (2011) Renal protection from prolonged cold ischemia and warm reperfusion in hibernating squirrels. *Transplantation* 92: 1215–1221.
- Dave KR, Prado R, Raval AP, Drew KL, Perez-Pinzon MA (2006) The arctic ground squirrel brain is resistant to injury from cardiac arrest during euthermia. *Stroke* 37: 1261–1265.
- Dave KR, Anthony Defazio R, Raval AP, Dashkin O, Saul I, et al. (2009) Protein kinase C epsilon activation delays neuronal depolarization during cardiac arrest in the euthermic arctic ground squirrel. *J Neurochem* 110: 1170–1179.
- Bogren LKOJ, Carpluk J, Moore JT, Drew KL (2014) Resistance to systemic inflammation and multi organ damage after global ischemia/reperfusion in the arctic ground squirrel. Submitted to PLOS ONE.
- Epperson LE, Rose JC, Carey HV, Martin SL (2009) Seasonal proteomic changes reveal molecular adaptations to preserve and replenish liver proteins during ground squirrel hibernation. *Am J Physiol Regul Integr Comp Physiol*.
- Serkova NJ, Rose JC, Epperson LE, Carey HV, Martin SL (2007) Quantitative analysis of liver metabolites in three stages of the circannual hibernation cycle in 13-lined ground squirrels by NMR. *Physiol Genomics* 31: 15–24.
- Carey HV, Andrews MT, Martin SL (2003) Mammalian hibernation: cellular and molecular responses to depressed metabolism and low temperature. *Physiol Rev* 83: 1153–1181.
- Dark J (2005) Annual lipid cycles in hibernators: integration of physiology and behavior. *Annu Rev Nutr* 25: 469–497.
- Epperson LE, Karimpour-Fard A, Hunter LE, Martin SL (2011) Metabolic cycles in a circannual hibernator. *Physiol Genomics* 43: 799–807.
- Epperson LE, Rose JC, Russell RL, Nikrad MP, Carey HV, et al. (2010) Seasonal protein changes support rapid energy production in hibernator brainstem. *J Comp Physiol B* 180: 599–617.

**Figure S11 Example Jres NMR spectrum from unprocessed AGS plasma.** (TIF)

**Figure S12 Hydrophilic metabolic profiles for naïve, before SHS, after SHS, before HS, and after HS rats (A;  $R^2 = 0.75$ ,  $Q^2 = 0.15$ , permutation  $p = 0.90$ ) summer euthermic AGS (B;  $R^2 = 0.60$ ,  $Q^2 = 0.07$ , permutation  $p = 0.03$ ) and winter IBA-AGS (C;  $R^2 = 0.90$ ,  $Q^2 = 0.30$ , permutation  $p = 0.38$ ).** (TIF)

**Table S1 Experimental groups HS experiments.** (DOCX)

**Table S2 Characteristics of AGS undergoing HS during the winter (IBA) season.** (DOCX)

**Table S3 Characteristics of AGS undergoing HS during the summer (euthermic) season.** (DOCX)

**Table S4 Characteristics of AGS undergoing SHS during the winter (IBA) season.** (DOCX)

**Table S5 Characteristics of AGS undergoing SHS during the summer (euthermic) season.** (DOCX)

## Acknowledgments

The authors would like to thank T. Green and J. Moore for technical assistance, and B. Laughlin, K. McClure, and S. Rice for editorial services. We also thank J. Blake, C. Willetto, and C. Terzi for veterinary support and consultation.

## Author Contributions

Conceived and designed the experiments: LKB KLD. Performed the experiments: LKB CJM ELJ. Analyzed the data: LKB CJM NS NJS. Contributed reagents/materials/analysis tools: LKB CJM NS NJS KLD. Wrote the paper: LKB.

18. Williams CT, Goropashnaya AV, Buck CL, Fedorov VB, Kohl F, et al. (2011) Hibernating above the permafrost: effects of ambient temperature and season on expression of metabolic genes in liver and brown adipose tissue of arctic ground squirrels. *J Exp Biol* 214: 1300–1306.
19. Nelson CJ, Otis JP, Carey HV (2010) Global analysis of circulating metabolites in hibernating ground squirrels. *Comp Biochem Physiol Part D Genomics Proteomics* 5: 265–273.
20. Jani A, Orlicky DJ, Karimpour-Fard A, Epperson LE, Russell RL, et al. (2012) Kidney proteome changes provide evidence for a dynamic metabolism and regional redistribution of plasma proteins during torpor-arousal cycles of hibernation. *Physiol Genomics* 44: 717–727.
21. Hindle AG, Karimpour-Fard A, Epperson LE, Hunter LE, Martin SL (2011) Skeletal muscle proteomics: carbohydrate metabolism oscillates with seasonal and torpor-arousal physiology of hibernation. *Am J Physiol Regul Integr Comp Physiol* 301: R1440–1452.
22. Hampton M, Melvin RG, Kendall AH, Kirkpatrick BR, Peterson N, et al. (2011) Deep sequencing the transcriptome reveals seasonal adaptive mechanisms in a hibernating mammal. *PLoS One* 6: e27021.
23. Chaffin CL, Vandervoort CA (2013) Follicle growth, ovulation, and luteal formation in primates and rodents: a comparative perspective. *Exp Biol Med (Maywood)* 238: 539–548.
24. Ostadal B, Netuka I, Maly J, Besik J, Ostadalova I (2009) Gender differences in cardiac ischemic injury and protection—experimental aspects. *Exp Biol Med (Maywood)* 234: 1011–1019.
25. Barnes BM, Kretzmann M, Zucker I, Licht P (1988) Plasma androgen and gonadotropin levels during hibernation and testicular maturation in golden-mantled ground squirrels. *Biol Reprod* 38: 616–622.
26. Buck CL, Barnes BM (2003) Androgen in free-living arctic ground squirrels: seasonal changes and influence of staged male-male aggressive encounters. *Horm Behav* 43: 318–326.
27. Serkova N, Fuller TF, Klawitter J, Freise CE, Niemann CU (2005) H-NMR-based metabolic signatures of mild and severe ischemia/reperfusion injury in rat kidney transplants. *Kidney Int* 67: 1142–1151.
28. Stringer KA, Serkova NJ, Karnovsky A, Guire K, Paine R, et al. (2011) Metabolic consequences of sepsis-induced acute lung injury revealed by plasma <sup>1</sup>H-nuclear magnetic resonance quantitative metabolomics and computational analysis. *Am J Physiol Lung Cell Mol Physiol* 300: L4-L11.
29. Kriat M, Vion-Dury J, Confort-Gouny S, Favre R, Viout P, et al. (1993) Analysis of plasma lipids by NMR spectroscopy: application to modifications induced by malignant tumors. *J Lipid Res* 34: 1009–1019.
30. Nicholson JK, Foaall PJ, Spraul M, Farrant RD, Lindon JC (1995) 750 MHz <sup>1</sup>H and <sup>1</sup>H-<sup>13</sup>C NMR spectroscopy of human blood plasma. *Anal Chem* 67: 793–811.
31. Xia J, Mandal R, Sinelnikov IV, Broadhurst D, Wishart DS (2012) MetaboAnalyst 2.0—a comprehensive server for metabolomic data analysis. *Nucleic Acids Res* 40: W127–133.
32. Xia J, Psychogios N, Young N, Wishart DS (2009) MetaboAnalyst: a web server for metabolomic data analysis and interpretation. *Nucleic Acids Res* 37: W652–660.
33. Rohrig R, Wegewitz C, Lendemans S, Petrat F, de Groot H (2014) Superiority of acetate compared with lactate in a rodent model of severe hemorrhagic shock. *J Surg Res* 186: 338–345.
34. Almac E, Aksu U, Bezemer R, Jong W, Kandil A, et al. (2012) The acute effects of acetate-balanced colloid and crystalloid resuscitation on renal oxygenation in a rat model of hemorrhagic shock. *Resuscitation* 83: 1166–1172.
35. Umeda K, Takahashi T, Inoue K, Shimizu H, Maeda S, et al. (2009) Prevention of hemorrhagic shock-induced intestinal tissue injury by glutamine via heme oxygenase-1 induction. *Shock* 31: 40–49.
36. Yang R, Martin-Hawver L, Woodall C, Thomas A, Qureshi N, et al. (2007) Administration of glutamine after hemorrhagic shock restores cellular energy, reduces cell apoptosis and damage, and increases survival. *JPEN J Parenter Enteral Nutr* 31: 94–100.
37. Mulier KE, Lexcen DR, Luzcek E, Greenberg JJ, Beilman GJ (2012) Treatment with beta-hydroxybutyrate and melatonin is associated with improved survival in a porcine model of hemorrhagic shock. *Resuscitation* 83: 253–258.
38. Angele MK, Schneider CP, Chaudry IH (2008) Bench-to-bedside review: latest results in hemorrhagic shock. *Crit Care* 12: 218.
39. Wilson M, Davis DP, Coimbra R (2003) Diagnosis and monitoring of hemorrhagic shock during the initial resuscitation of multiple trauma patients: a review. *J Emerg Med* 24: 413–422.
40. Cohen MJ, Serkova NJ, Wiener-Kronish J, Pittet JF, Niemann CU (2010) <sup>1</sup>H-NMR-based metabolic signatures of clinical outcomes in trauma patients—beyond lactate and base deficit. *J Trauma* 69: 31–40.
41. Serkova NJ, Standiford TJ, Stringer KA (2011) The emerging field of quantitative blood metabolomics for biomarker discovery in critical illnesses. *Am J Respir Crit Care Med* 184: 647–655.
42. Niemann CU, Hirose R, Liu T, Behrends M, Brown JL, et al. (2005) Ischemic preconditioning improves energy state and transplantation survival in obese Zucker rat livers. *Anesth Analg* 101: 1577–1583.
43. Niemann CU, Choi S, Behrends M, Hirose R, Noh J, et al. (2006) Mild hypothermia protects obese rats from fulminant hepatic necrosis induced by ischemia-reperfusion. *Surgery* 140: 404–412.
44. Serkova NJ, Jackman M, Brown JL, Liu T, Hirose R, et al. (2006) Metabolic profiling of livers and blood from obese Zucker rats. *J Hepatol* 44: 956–962.
45. Andrews MT (2007) Advances in molecular biology of hibernation in mammals. *Bioessays* 29: 431–440.
46. Andrews MT, Russeth KP, Drewes LR, Henry PG (2009) Adaptive mechanisms regulate preferred utilization of ketones in the heart and brain of a hibernating mammal during arousal from torpor. *Am J Physiol Regul Integr Comp Physiol* 296: R383–393.
47. Carey HV, Potter KT, Peters TL, Epperson LE, Rose JC, et al. (2006) Hibernating mammals have enhanced survival and reduced gut damage after hemorrhage. *Faseb Journal* 20: A1382–A1382.
48. Podgoreanu MV, Qing M, Mackensen BG, Zhang Z, Smith MP, et al. (2011) The Hibernator Phenotype is Cardioprotective in the Setting of Deep Hypothermic Circulatory Arrest. American Heart Association, American Stroke Association. Orlando, FL: Duke University, University of Alaska Fairbanks.
49. Maalouf M, Rho JM, Mattson MP (2009) The neuroprotective properties of caloric restriction, the ketogenic diet, and ketone bodies. *Brain Res Rev* 59: 293–315.
50. Klein AH, Wendroth SM, Drewes LR, Andrews MT (2010) Small-volume d-beta-hydroxybutyrate solution infusion increases survivability of lethal hemorrhagic shock in rats. *Shock* 34: 565–572.
51. Tai KK, Nguyen N, Pham L, Truong DD (2008) Ketogenic diet prevents cardiac arrest-induced cerebral ischemic neurodegeneration. *J Neural Transm* 115: 1011–1017.
52. Al-Zaid NS, Dasthi HM, Mathew TC, Juggi JS (2007) Low carbohydrate ketogenic diet enhances cardiac tolerance to global ischaemia. *Acta Cardiol* 62: 381–389.
53. Engel FL, Winton MG, Long CN (1943) Biochemical Studies on Shock : I. The Metabolism of Amino Acids and Carbohydrate during Hemorrhagic Shock in the Rat. *J Exp Med* 77: 397–410.
54. Koustova E, Rhee P, Hancock T, Chen H, Inocencio R, et al. (2003) Ketone and pyruvate Ringer's solutions decrease pulmonary apoptosis in a rat model of severe hemorrhagic shock and resuscitation. *Surgery* 134: 267–274.
55. Hara J, Fujimura M, Myou S, Kita T, Abo M, et al. (2008) Sputum eosinophilia, airway hyperresponsiveness and airway narrowing in young adults with former asthma. *Allergol Int* 57: 211–217.
56. Geiser F (1988) Reduction of metabolism during hibernation and daily torpor in mammals and birds: temperature effect or physiological inhibition? *J Comp Physiol B* 158: 25–37.
57. Geiser F (2004) Metabolic rate and body temperature reduction during hibernation and daily torpor. *Annu Rev Physiol* 66: 239–274.
58. Suzuki M, Kitamura Y, Mori S, Sato K, Dohi S, et al. (2002) Beta-hydroxybutyrate, a cerebral function improving agent, protects rat brain against ischemic damage caused by permanent and transient focal cerebral ischemia. *Jpn J Pharmacol* 89: 36–43.
59. Suzuki M, Sato K, Dohi S, Sato T, Matsuura A, et al. (2001) Effect of beta-hydroxybutyrate, a cerebral function improving agent, on cerebral hypoxia, anoxia and ischemia in mice and rats. *Jpn J Pharmacol* 87: 143–150.
60. Epperson LE, Rose JC, Carey HV, Martin SL (2010) Seasonal proteomic changes reveal molecular adaptations to preserve and replenish liver proteins during ground squirrel hibernation. *Am J Physiol Regul Integr Comp Physiol* 298: R329–340.
61. Park Y, Hirose R, Coatney JL, Ferrell L, Behrends M, et al. (2007) Ischemia-reperfusion injury is more severe in older versus young rat livers. *J Surg Res* 137: 96–102.
62. Waters NJ, Waterfield CJ, Farrant RD, Holmes E, Nicholson JK (2005) Metabonomic deconvolution of embedded toxicity: application to thioacetamide hepato- and nephrotoxicity. *Chem Res Toxicol* 18: 639–654.
63. McNelis J, Marini CP, Jurkiewicz A, Szomstein S, Simms HH, et al. (2001) Prolonged lactate clearance is associated with increased mortality in the surgical intensive care unit. *Am J Surg* 182: 481–485.
64. Frerichs KU, Hallenbeck JM (1998) Hibernation in ground squirrels induces state and species-specific tolerance to hypoxia and aglycemia: an in vitro study in hippocampal slices. *J Cereb Blood Flow Metab* 18: 168–175.
65. Christian SL, Ross AP, Zhao HW, Kristenson HJ, Zhan X, et al. (2008) Arctic ground squirrel (*Spermophilus parryi*) hippocampal neurons tolerate prolonged oxygen-glucose deprivation and maintain baseline ERK1/2 and JNK activation despite drastic ATP loss. *J Cereb Blood Flow Metab* 28: 1307–1319.
66. Storey KB (2010) Out cold: biochemical regulation of mammalian hibernation - a mini-review. *Gerontology* 56: 220–230.
67. Frerichs KU, Kennedy C, Sokoloff L, Hallenbeck JM (1994) Local cerebral blood flow during hibernation, a model of natural tolerance to "cerebral ischemia". *J Cereb Blood Flow Metab* 14: 193–205.
68. Dave KR, Christian SL, Perez-Pinzon MA, Drew KL (2012) Neuroprotection: lessons from hibernators. *Comp Biochem Physiol B Biochem Mol Biol* 162: 1–9.
69. Barnes BM (1989) Freeze avoidance in a mammal: body temperatures below 0 degree C in an Arctic hibernator. *Science* 244: 1593–1595.
70. Serkova NJ, Brown MS (2012) Quantitative analysis in magnetic resonance spectroscopy: from metabolic profiling to in vivo biomarkers. *Bioanalysis* 4: 321–341.
71. Barton RH, Waterman D, Bonner FW, Holmes E, Clarke R, et al. (2010) The influence of EDTA and citrate anticoagulant addition to human plasma on information recovery from NMR-based metabolic profiling studies. *Mol Biosyst* 6: 215–224.
